# Supplementary material for: The microbiota-gut-brain-immune interface in the pathogenesis of neuroinflammatory diseases: a narrative review of the emerging literature
Source: Front Immunol. 2024 May 16;15:1365673. doi: 10.3389/fimmu.2024.1365673 (PMC11137262; doi:10.3389/fimmu.2024.1365673)
Supplement: Supplementary Table 1 — Observed functional relationship with the gut microbiota. [file Table_1.xlsx]

## Sheet: Sheet1
Kingdom	Phylum	Class	Order	Family	Genus	Species		Observed Functional Relationships
							Strain(s)	Generally	Alzheimer's Disease	Parkinson's Disease	Multiple Sclerosis
Bacteria	Actinomycetota	Actinomycetia	Bifidobacteriales	Bifidobacteriaceae	Bifidobacterium	animalis	subsp. lactis				Outperform Bifidobacterium as a therapeutic in experimental models (comprehensive review of animal models) (1)
						bifidum	BGN4		1) Alters microbiome composition (RCT) (2) 2) May improve mental flexibility, stress, BDNF, and memory (RCT, mice) (2,3) 3) Reduces pathologies, e.g. amyloid-β, apoptosis, synaptic plasticity, neuro-inflammation (mice) (3)
						breve	MCC1274 (A1), CCFM1025, HNXY26M4, WX, CCFM1067		1) May improve cognitive function/slow progression (RCTs, mice) (4-8) 2) Reduces pathologies, e.g. amyloid-β, phosphorylated tau, glial activation, synaptic protein/plasticity (mice) (7-11)	1) Alters microbiome composition, increases SCFAs (mice) (12) 2) Reduces pathologies, e.g. neuronal loss, glial activation, neuroinflammation, brain and gut barrier function (mice) (12,13)
						lactis	Probio-M8		Reduces pathology, i.e. amyloid-β (mice) (14)
						longum	BORI, BB68S, R0175		1) Alters microbiome composition (RCT) (15) 2) May improve mental flexibility, stress, BDNF, cognitive function/memory (RCTs) (15-17)
	Bacillota	Bacilli	Lactobacillales	Lactobacillaceae	Lacticaseibacillus (f.k.a. Lactobacillus)			Improve cognitive function/performance and reduce neuroinflammation (systematic review) (18)			Outperform Bifidobacterium as a therapeutic in experimental models (comprehensive review of animal models) (19)
						paracasei					Outperform Bifidobacterium as a therapeutic in experimental models (comprehensive review of animal models) (20)
						plantarum	CCFM405, PS128		1) Alters microbiome composition and constipation (rodents) (21-23) 2) Improved motor deficits (rodents) (21-23) 3) Reduced pathologies, e.g. neuronal loss, gut and neuroinflammation, dopamine, serotonin (rodents) (21-23)
						rhamnosus (f.k.a. reuteri)	JB-1, HA-114, UBLR-58, GG (Culturelle®)	1) Alterations via the vagus nerve (rodent models) (25) 2) Pending RCT for psychological status and executive functioning / processing speed (26)	1) May improve cognition (RCT) (27) 2) May act as an adjuvant to phytochemicals (curcumin in mice) (28)	May slow neuronal loss (mice) (29-32)
					Limosilactobacillus	reuteri	SL001, DSM 17938	Alterations via the vagus nerve (mouse models) (33)	Alters microbiome composition (mice) (34)		May increase risk of autoimmune neuroinflammation via altered tryptophan metabolism (mice/mechanism) (35-38)
		Clostridia	Eubacteriales	Lachnospiraceae	Roseburia					Consistently elevated in diverse populations of people with PD (meta-analyses) (39-41)
	Bacteroidota	Bacteroidia	Bacteroidales	Bacteroidaceae	Bacteroides	fragilis		Secretes a highly inflammatory form of LPS (BF-LPS) and a neurotoxin (fragilysin), which reduces barrier function (leaky gut/brain) (42,43)
						vulgatus			Reduced glutamate metabolism, impaired memory and learning (Systematic Review) (44)
				Prevotellaceace					Composition Only: More common by APOE genotypes in mice and humans (observational) (45)
					Prevotella	histicola					Outperform Bifidobacterium as a therapeutic in experimental models (comprehensive review of animal models) (46)
	Campylobacterota (f.k.a. Proteobacteria)	Epsilonproteobacteria	Campylobacterales	Campylobacteraceae	Campylobacter	jejuni		1) Alterations via the vagus nerve (in vitro) (47) 2) Endotoxins/ antigens may trigger inflammation (mice/ mechinism) (48,49)	Reduced glutamate metabolism, impaired memory and learning (Systematic Review) (50)	Potential link in one case study (temporality uknown) (51)
	Pseudomonadota	Gammaproteobacteria	Enterobacterales	Enterobacteriaceae	Escherichia	coli	Nissle 1917 (EcN)	Some strains secrete a highly inflammatory form of LPS (BF-LPS) and a neurotoxin (fragilysin), which reduces barrier function (leaky gut/brain) (52-54)			1) Delayed experimental disease onset and disease severity (mice) (55) 2) Reduces pathology, e.g. perivascular cuffing, CNS infiltration by CD4+ T cells, Th1 cells, microglial activation (mice) (55) 3) Clinically therapeutic in experimental models (comprehensive review of animal models) (56)
	Verrucomicrobiota	Verrucomicrobiae	Verrucomicrobiales	Akkermansiaceae	Akkermansia					Consistently elevated in diverse populations of people with PD (meta-analyses) (57-59)
1. Blais LL, Montgomery TL, Amiel E, Deming PB, Krementsov DN. Probiotic and commensal gut microbial therapies in multiple sclerosis and its animal models: a comprehensive review. Gut Microbes. 2021;13(1):1943289. doi:10.1080/19490976.2021.1943289
2. Kim CS, Cha L, Sim M, et al. Probiotic Supplementation Improves Cognitive Function and Mood with Changes in Gut Microbiota in Community-Dwelling Older Adults: A Randomized, Double-Blind, Placebo-Controlled, Multicenter Trial. J Gerontol A Biol Sci Med Sci. 2021;76(1):32-40. doi:10.1093/gerona/glaa090
2,3: Kim H, Kim S, Park SJ, et al. Administration of Bifidobacterium bifidum BGN4 and Bifidobacterium longum BORI Improves Cognitive and Memory Function in the Mouse Model of Alzheimer's Disease. Front Aging Neurosci. 2021;13:709091. Published 2021 Aug 6. doi:10.3389/fnagi.2021.709091
3. Kim H, Kim S, Park SJ, et al. Administration of Bifidobacterium bifidum BGN4 and Bifidobacterium longum BORI Improves Cognitive and Memory Function in the Mouse Model of Alzheimer's Disease. Front Aging Neurosci. 2021;13:709091. Published 2021 Aug 6. doi:10.3389/fnagi.2021.709091
4. Asaoka D, Xiao J, Takeda T, et al. Effect of Probiotic Bifidobacterium breve in Improving Cognitive Function and Preventing Brain Atrophy in Older Patients with Suspected Mild Cognitive Impairment: Results of a 24-Week Randomized, Double-Blind, Placebo-Controlled Trial. J Alzheimers Dis. 2022;88(1):75-95. doi:10.3233/JAD-220148
5. Kobayashi Y, Kinoshita T, Matsumoto A, Yoshino K, Saito I, Xiao JZ. Bifidobacterium Breve A1 Supplementation Improved Cognitive Decline in Older Adults with Mild Cognitive Impairment: An Open-Label, Single-Arm Study. J Prev Alzheimers Dis. 2019;6(1):70-75. doi:10.14283/jpad.2018.32
6. Kobayashi Y, Kuhara T, Oki M, Xiao JZ. Effects of Bifidobacterium breve A1 on the cognitive function of older adults with memory complaints: a randomised, double-blind, placebo-controlled trial. Benef Microbes. 2019;10(5):511-520. doi:10.3920/BM2018.0170
7. Zhu G, Zhao J, Wang G, Chen W. Bifidobacterium breve HNXY26M4 Attenuates Cognitive Deficits and Neuroinflammation by Regulating the Gut-Brain Axis in APP/PS1 Mice. J Agric Food Chem. 2023;71(11):4646-4655. doi:10.1021/acs.jafc.3c00652
8. Zhu G, Zhao J, Zhang H, Chen W, Wang G. Administration of Bifidobacterium breve Improves the Brain Function of Aβ1-42-Treated Mice via the Modulation of the Gut Microbiome. Nutrients. 2021;13(5):1602. Published 2021 May 11. doi:10.3390/nu13051602
9. Abdelhamid M, Zhou C, Jung CG, Michikawa M. Probiotic Bifidobacterium breve MCC1274 Mitigates Alzheimer's Disease-Related Pathologies in Wild-Type Mice. Nutrients. 2022;14(12):2543. Published 2022 Jun 19. doi:10.3390/nu14122543
10. Zhu G, Guo M, Zhao J, Zhang H, Wang G, Chen W. Bifidobacterium breve intervention combined with environmental enrichment alleviates cognitive impairment by regulating the gut microbiota and microbial metabolites in Alzheimer's disease mice. Front Immunol. 2022;13:1013664. Published 2022 Sep 20. doi:10.3389/fimmu.2022.1013664
11. Zhu G, Guo M, Zhao J, Zhang H, Wang G, Chen W. Integrative Metabolomic Characterization Reveals the Mediating Effect of Bifidobacterium breve on Amino Acid Metabolism in a Mouse Model of Alzheimer's Disease. Nutrients. 2022;14(4):735. Published 2022 Feb 9. doi:10.3390/nu14040735
12. Li T, Chu C, Yu L, et al. Neuroprotective Effects of Bifidobacterium breve CCFM1067 in MPTP-Induced Mouse Models of Parkinson's Disease. Nutrients. 2022;14(21):4678. Published 2022 Nov 4. doi:10.3390/nu14214678
13. Ishii T, Furuoka H, Kaya M, Kuhara T. Oral Administration of Probiotic Bifidobacterium breve Improves Facilitation of Hippocampal Memory Extinction via Restoration of Aberrant Higher Induction of Neuropsin in an MPTP-Induced Mouse Model of Parkinson's Disease. Biomedicines. 2021;9(2):167. Published 2021 Feb 8. doi:10.3390/biomedicines9020167
14. Cao J, Amakye WK, Qi C, Liu X, Ma J, Ren J. Bifidobacterium Lactis Probio-M8 regulates gut microbiota to alleviate Alzheimer's disease in the APP/PS1 mouse model. Eur J Nutr. 2021;60(7):3757-3769. doi:10.1007/s00394-021-02543-x
15. Kim CS, Cha L, Sim M, et al. Probiotic Supplementation Improves Cognitive Function and Mood with Changes in Gut Microbiota in Community-Dwelling Older Adults: A Randomized, Double-Blind, Placebo-Controlled, Multicenter Trial. J Gerontol A Biol Sci Med Sci. 2021;76(1):32-40. doi:10.1093/gerona/glaa090
16. Shi S, Zhang Q, Sang Y, et al. Probiotic Bifidobacterium longum BB68S Improves Cognitive Functions in Healthy Older Adults: A Randomized, Double-Blind, Placebo-Controlled Trial. Nutrients. 2022;15(1):51. Published 2022 Dec 22. doi:10.3390/nu15010051
17. Akhgarjand C, Vahabi Z, Shab-Bidar S, Etesam F, Djafarian K. Effects of probiotic supplements on cognition, anxiety, and physical activity in subjects with mild and moderate Alzheimer's disease: A randomized, double-blind, and placebo-controlled study. Front Aging Neurosci. 2022;14:1032494. Published 2022 Oct 31. doi:10.3389/fnagi.2022.1032494
18. Barrio C, Arias-Sánchez S, Martín-Monzón I. The gut microbiota-brain axis, psychobiotics and its influence on brain and behaviour: A systematic review. Psychoneuroendocrinology. 2022;137:105640. doi:10.1016/j.psyneuen.2021.105640
19. Blais LL, Montgomery TL, Amiel E, Deming PB, Krementsov DN. Probiotic and commensal gut microbial therapies in multiple sclerosis and its animal models: a comprehensive review. Gut Microbes. 2021;13(1):1943289. doi:10.1080/19490976.2021.1943289
20. Blais LL, Montgomery TL, Amiel E, Deming PB, Krementsov DN. Probiotic and commensal gut microbial therapies in multiple sclerosis and its animal models: a comprehensive review. Gut Microbes. 2021;13(1):1943289. doi:10.1080/19490976.2021.1943289
21. Chu C, Yu L, Li Y, et al. Lactobacillus plantarum CCFM405 against Rotenone-Induced Parkinson's Disease Mice via Regulating Gut Microbiota and Branched-Chain Amino Acids Biosynthesis. Nutrients. 2023;15(7):1737. Published 2023 Apr 1. doi:10.3390/nu15071737
22. Lee YZ, Cheng SH, Chang MY, Lin YF, Wu CC, Tsai YC. Neuroprotective Effects of Lactobacillus plantarum PS128 in a Mouse Model of Parkinson's Disease: The Role of Gut Microbiota and MicroRNAs. Int J Mol Sci. 2023;24(7):6794. Published 2023 Apr 5. doi:10.3390/ijms24076794
23. Liao JF, Cheng YF, You ST, et al. Lactobacillus plantarum PS128 alleviates neurodegenerative progression in 1-methyl-4-phenyl-1,2,3,6-tetrahydropyridine-induced mouse models of Parkinson's disease. Brain Behav Immun. 2020;90:26-46. doi:10.1016/j.bbi.2020.07.036
24. Champagne-Jorgensen K, Mian MF, McVey Neufeld KA, Stanisz AM, Bienenstock J. Membrane vesicles of Lacticaseibacillus rhamnosus JB-1 contain immunomodulatory lipoteichoic acid and are endocytosed by intestinal epithelial cells. Sci Rep. 2021;11(1):13756. Published 2021 Jul 2. doi:10.1038/s41598-021-93311-8
25. Fülling C, Dinan TG, Cryan JF. Gut Microbe to Brain Signaling: What Happens in Vagus…. Neuron. 2019;101(6):998-1002. doi:10.1016/j.neuron.2019.02.008
26. Sanborn V, Azcarate-Peril MA, Updegraff J, Manderino LM, Gunstad J. A randomized clinical trial examining the impact of LGG probiotic supplementation on psychological status in middle-aged and older adults. Contemp Clin Trials Commun. 2018;12:192-197. Published 2018 Nov 14. doi:10.1016/j.conctc.2018.11.006
27. Akhgarjand C, Vahabi Z, Shab-Bidar S, Etesam F, Djafarian K. Effects of probiotic supplements on cognition, anxiety, and physical activity in subjects with mild and moderate Alzheimer's disease: A randomized, double-blind, and placebo-controlled study. Front Aging Neurosci. 2022;14:1032494. Published 2022 Oct 31. doi:10.3389/fnagi.2022.1032494
28. Patel C, Pande S, Acharya S. Potentiation of anti-Alzheimer activity of curcumin by probiotic Lactobacillus rhamnosus UBLR-58 against scopolamine-induced memory impairment in mice. Naunyn Schmiedebergs Arch Pharmacol. 2020;393(10):1955-127962. doi:10.1007/s00210-020-01904-3
29. Liu X, Du ZR, Wang X, et al. Polymannuronic acid prebiotic plus Lacticaseibacillus rhamnosus GG probiotic as a novel synbiotic promoted their separate neuroprotection against Parkinson's disease. Food Res Int. 2022;155:111067. doi:10.1016/j.foodres.2022.111067
30. Parra I, Martínez I, Vásquez-Celaya L, Gongora-Alfaro JL, Tizabi Y, Mendieta L. Neuroprotective and Immunomodulatory Effects of Probiotics in a Rat Model of Parkinson's Disease. Neurotox Res. 2023;41(2):187-200. doi:10.1007/s12640-022-00627-y
31. Cuevas-Carbonell SG, Vásquez-Celaya L, García-López D, et al. Chronic Treatment with the Probiotics Lacticaseibacillus rhamnosus GG and Bifidobacterium lactis BB12 Attenuates Motor Impairment, Striatal Microglial Activation, and Dopaminergic Loss in Rats with 6-Hydroxydopamine-induced Hemiparkinsonism. Neuroscience. 2022;507:79-98. doi:10.1016/j.neuroscience.2022.11.004
32. Xie C, Prasad AA. Probiotics Treatment Improves Hippocampal Dependent Cognition in a Rodent Model of Parkinson's Disease. Microorganisms. 2020;8(11):1661. Published 2020 Oct 27. doi:10.3390/microorganisms8111661
33. Fülling C, Dinan TG, Cryan JF. Gut Microbe to Brain Signaling: What Happens in Vagus…. Neuron. 2019;101(6):998-1002. doi:10.1016/j.neuron.2019.02.008
34. Montgomery TL, Eckstrom K, Lile KH, et al. Lactobacillus reuteri tryptophan metabolism promotes host susceptibility to CNS autoimmunity. Microbiome. 2022;10(1):198. Published 2022 Nov 23. doi:10.1186/s40168-022-01408-7
35. Liu M, Hu R, Guo Y, et al. Sheng Wu Gong Cheng Xue Bao. 2020;36(9):1887-1898. doi:10.13345/j.cjb.200024
36. Montgomery TL, Künstner A, Kennedy JJ, et al. Interactions between host genetics and gut microbiota determine susceptibility to CNS autoimmunity. Proc Natl Acad Sci U S A. 2020;117(44):27516-27527. doi:10.1073/pnas.2002817117
37. Miyauchi E, Kim SW, Suda W, et al. Gut microorganisms act together to exacerbate inflammation in spinal cords. Nature. 2020;585(7823):102-106. doi:10.1038/s41586-020-2634-9
38. He B, Hoang TK, Tian X, et al. Lactobacillus reuteri Reduces the Severity of Experimental Autoimmune Encephalomyelitis in Mice by Modulating Gut Microbiota. Front Immunol. 2019;10:385. Published 2019 Mar 7. doi:10.3389/fimmu.2019.00385
39. Toh TS, Chong CW, Lim SY, et al. Gut microbiome in Parkinson's disease: New insights from meta-analysis. Parkinsonism Relat Disord. 2022;94:1-9. doi:10.1016/j.parkreldis.2021.11.017
40. Nie S, Wang J, Deng Y, Ye Z, Ge Y. Inflammatory microbes and genes as potential biomarkers of Parkinson's disease. NPJ Biofilms Microbiomes. 2022;8(1):101. Published 2022 Dec 24. doi:10.1038/s41522-022-00367-z
41. Kleine Bardenhorst S, Cereda E, Severgnini M, et al. Gut microbiota dysbiosis in Parkinson disease: A systematic review and pooled analysis. Eur J Neurol. 2023;10.1111/ene.15671. doi:10.1111/ene.15671
42. Lukiw WJ, Arceneaux L, Li W, Bond T, Zhao Y. Gastrointestinal (GI)-Tract Microbiome Derived Neurotoxins and their Potential Contribution to Inflammatory Neurodegeneration in Alzheimer's Disease (AD). J Alzheimers Dis Parkinsonism. 2021;11(6):525.
43. Zhao Y, Lukiw WJ. Bacteroidetes Neurotoxins and Inflammatory Neurodegeneration. Mol Neurobiol. 2018;55(12):9100-9107. doi:10.1007/s12035-018-1015-y
44. Chang CH, Lin CH, Lane HY. d-glutamate and Gut Microbiota in Alzheimer's Disease. Int J Mol Sci. 2020;21(8):2676. Published 2020 Apr 11. doi:10.3390/ijms21082676
45. Tran TTT, Corsini S, Kellingray L, et al. APOE genotype influences the gut microbiome structure and function in humans and mice: relevance for Alzheimer's disease pathophysiology. FASEB J. 2019;33(7):8221-8231. doi:10.1096/fj.201900071R
46. Blais LL, Montgomery TL, Amiel E, Deming PB, Krementsov DN. Probiotic and commensal gut microbial therapies in multiple sclerosis and its animal models: a comprehensive review. Gut Microbes. 2021;13(1):1943289. doi:10.1080/19490976.2021.1943289
47. Fülling C, Dinan TG, Cryan JF. Gut Microbe to Brain Signaling: What Happens in Vagus…. Neuron. 2019;101(6):998-1002. doi:10.1016/j.neuron.2019.02.008
48. Malik A, Brudvig JM, Gadsden BJ, Ethridge AD, Mansfield LS. Campylobacter jejuni induces autoimmune peripheral neuropathy via Sialoadhesin and Interleukin-4 axes. Gut Microbes. 2022;14(1):2064706. doi:10.1080/19490976.2022.2064706
49. Stephenson HN, John CM, Naz N, et al. Campylobacter jejuni lipooligosaccharide sialylation, phosphorylation, and amide/ester linkage modifications fine-tune human Toll-like receptor 4 activation. J Biol Chem. 2013;288(27):19661-19672. doi:10.1074/jbc.M113.468298
50. Chang CH, Lin CH, Lane HY. d-glutamate and Gut Microbiota in Alzheimer's Disease. Int J Mol Sci. 2020;21(8):2676. Published 2020 Apr 11. doi:10.3390/ijms21082676
51. Rajabally YA, Ramlackhansingh A, Fraser M, Abbott RJ. Neuroleptic malignant syndrome and acute motor axonal neuropathy after Campylobacter jejuni infection. Neurophysiol Clin. 2009;39(3):135-138. doi:10.1016/j.neucli.2009.02.001
52. Iguchi A, Iyoda S, Kikuchi T, et al. A complete view of the genetic diversity of the Escherichia coli O-antigen biosynthesis gene cluster. DNA Res. 2015;22(1):101-107. doi:10.1093/dnares/dsu043
53. Zhao Y, Jaber V, Lukiw WJ. Secretory Products of the Human GI Tract Microbiome and Their Potential Impact on Alzheimer's Disease (AD): Detection of Lipopolysaccharide (LPS) in AD Hippocampus. Front Cell Infect Microbiol. 2017;7:318. Published 2017 Jul 11. doi:10.3389/fcimb.2017.00318
54. Zhan X, Stamova B, Sharp FR. Lipopolysaccharide Associates with Amyloid Plaques, Neurons and Oligodendrocytes in Alzheimer's Disease Brain: A Review. Front Aging Neurosci. 2018;10:42. Published 2018 Feb 22. doi:10.3389/fnagi.2018.00042
55. Libbey JE, Sanchez JMS, Fleming BA, et al. Modulation of experimental autoimmune encephalomyelitis through colonisation of the gut with Escherichia coli. Benef Microbes. 2020;11(7):669-684. doi:10.3920/BM2020.0012
56. Blais LL, Montgomery TL, Amiel E, Deming PB, Krementsov DN. Probiotic and commensal gut microbial therapies in multiple sclerosis and its animal models: a comprehensive review. Gut Microbes. 2021;13(1):1943289. doi:10.1080/19490976.2021.1943289
57. Toh TS, Chong CW, Lim SY, et al. Gut microbiome in Parkinson's disease: New insights from meta-analysis. Parkinsonism Relat Disord. 2022;94:1-9. doi:10.1016/j.parkreldis.2021.11.017
58. Nie S, Wang J, Deng Y, Ye Z, Ge Y. Inflammatory microbes and genes as potential biomarkers of Parkinson's disease. NPJ Biofilms Microbiomes. 2022;8(1):101. Published 2022 Dec 24. doi:10.1038/s41522-022-00367-z
59. Kleine Bardenhorst S, Cereda E, Severgnini M, et al. Gut microbiota dysbiosis in Parkinson disease: A systematic review and pooled analysis. Eur J Neurol. 2023;10.1111/ene.15671. doi:10.1111/ene.15671
